# Supplementary material
Source: publisher site journal article supplement (http://www.spandidos-publications.com/3958/downloadSupplementary)
Supplement: Supplementary file 1 [file downloadSupplementary]

## Sheet: FTC_vs_FT_up_enrichment
Table SXI. KEGG Enrichment of upregulated differentially expressed genes between fallopian tube cancer and healthy fallopian tube tissue groups.
KEGG ID	P-value	OddsRatio	ExpCount	Count	Size	Term
4147	0.0105423	1.5918	22.5325	34	1725	Exosome
3019	0.0021271	2.03644	11.939	23	914	Messenger RNA biogenesis
5165	0.00339196	2.15115	8.79096	18	673	Human papillomavirus infection
3018	0.00010528	4.30782	2.74309	11	210	RNA degradation
5222	0.00360726	3.39017	2.48184	8	190	Small cell lung cancer
4514	0.0373501	2.52386	2.45572	6	188	Cell adhesion molecules (CAMs)
30	0.00397285	5.11127	1.04499	5	80	Pentose phosphate pathway
537	0.0214167	3.29821	1.58054	5	121	Glycosylphosphatidylinositol (GPI)-anchored proteins
5323	0.0109327	3.94785	1.33236	5	102	Rheumatoid arthritis
51	0.0396541	3.2476	1.28011	4	98	Fructose and mannose metabolism
52	0.0303719	3.55107	1.17561	4	90	Galactose metabolism
4610	0.0384149	3.28268	1.26705	4	97	Complement and coagulation cascades
4612	0.0422003	3.17964	1.30623	4	100	Antigen processing and presentation
62	0.0289751	4.763	0.666179	3	51	Fatty acid elongation
3310	0.0455812	3.93991	0.796803	3	61	Nuclear receptors
5143	0.0481651	6.08116	0.352683	2	27	African trypanosomiasis
